# Supplementary material for: Shaping T Cell – B Cell Collaboration in the Response to Human Immunodeficiency Virus Type 1 Envelope Glycoprotein gp120 by Peptide Priming
Source: PubMed Central journal article supplement (PMC3679139; doi:10.1371/journal.pone.0065748), 2013-06-11

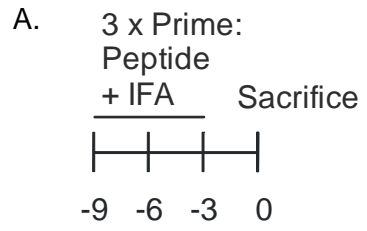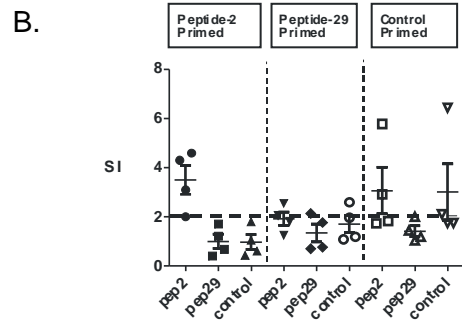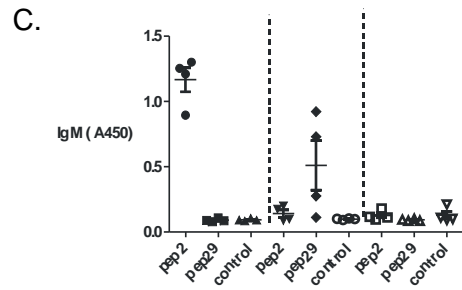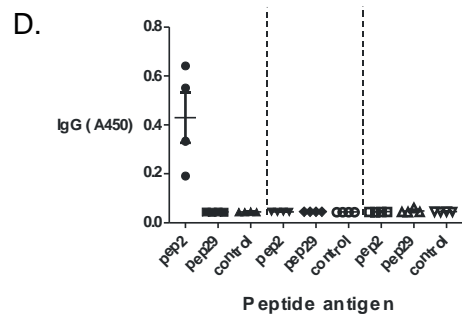

Supplement: pone.0065748.s002.pdf [file pone.0065748.s002.pdf]
