# Supplementary material for: Shaping T Cell – B Cell Collaboration in the Response to Human Immunodeficiency Virus Type 1 Envelope Glycoprotein gp120 by Peptide Priming
Source: PubMed Central journal article supplement (PMC3679139; doi:10.1371/journal.pone.0065748), 2013-06-11
Supplement: pone.0065748.s005.pdf [file pone.0065748.s005.pdf]

| Peptide | Sequence Number |     | Sequence              | Peptide | Sequence Number |     | Sequence              |
|---------|-----------------|-----|-----------------------|---------|-----------------|-----|-----------------------|
|         |                 |     |                       | 25      | 270             | 289 | EDIVIRSENFDTNAKTIIVQ  |
| 2       | 40              | 59  | GVPVWREATTTLFCASDAKA  | 26      | 280             | 299 | TDNAKTIIVQLNESVVINCT  |
| 3       | 50              | 69  | TLFCASDAKAYDTEVHNVWA  | 27      | 290             | 309 | LNESVVINCTRPNNTRRRL   |
| 4       | 60              | 79  | YDTEVHNVWATHACVPTDPN  | 28      | 300             | 319 | RPNNNTRRRRLSIGPGRFYA  |
| 5       | 70              | 89  | THACVPTDPNPQEVVLGNVTE | 29      | 310             | 329 | SIGPGRFYARRNIIGDIRQ   |
| 6       | 80              | 99  | PQEVVLGNVTENFNMWKNM   | 30      | 320             | 339 | RRNIIGDIRQAHCNISRAKW  |
| 7       | 90              | 109 | ENFNMWKNMVDQMHEDIIS   | 31      | 330             | 349 | AHCNISRAKWNNLQQIVIK   |
|         |                 |     |                       | 32      | 340             | 359 | NNLQQIVIKLREKFRNKTI   |
|         |                 |     |                       | 33      | 350             | 368 | LREKFRNKTIAFNQSSGGD   |
|         |                 |     |                       | 34      | 360             | 379 | AFNQSSGGDPEIVMHSFNCG  |
|         |                 |     |                       | 35      | 370             | 389 | EIVMHSFNCGGEFFYCNTAQ  |
|         |                 |     |                       | 36      | 380             | 399 | GEFFYCNTAQLFNSTWNVTG  |
|         |                 |     |                       | 37      | 390             | 409 | LFNSTWNVTTGGTNGTEGNDI |
|         |                 |     |                       | 38      | 400             | 419 | GTNGTEGNDIITLQCRKQI   |
|         |                 |     |                       | 39      | 410             | 429 | ITLQCRKQIINMWQKVGKA   |
| 16      | 180             | 199 | LDVVPIENTNNTKYRLISCN  | 40      | 420             | 439 | INMWQKVGKAMYAPPITGQI  |
| 17      | 190             | 209 | NTKYRLISCNVITQACPK    | 41      | 430             | 449 | MYAPPITGQIRCSSNITGLL  |
| 18      | 200             | 219 | TSVITQACPKVSFQPIPIHY  | 42      | 440             | 459 | RCSSNITGLLLTRDGGNSTE  |
| 19      | 210             | 229 | VSFQPIPIHYCVPAGFAMLK  | 43      | 450             | 469 | LTRDGGNSTETETEIFRPGG  |
| 20      | 220             | 239 | CVPAGFAMLKCNKTFNGSG   | 44      | 460             | 479 | TETEIFRPGGDMRDNWRSE   |
| 21      | 230             | 248 | CNNKTFNGSGPCTNVSTVQ   | 45      | 470             | 489 | GDMRDNWRSELYKYKVVRIE  |
| 22      | 240             | 259 | PCTNVSTVQCTHGIRPVVST  | 46      | 480             | 499 | LYKYKVVRIEPIGVAPTRAK  |
| 23      | 250             | 269 | THGIRPVVSTQLLLNGLAE   | 47      | 490             | 508 | PIGVAPTRAKRRTVQREKR   |
| 24      | 260             | 279 | QLLLNGLAEEDIVIRSENF   |         |                 |     |                       |
